# Supplementary material for: Anisotropic wetting and de-wetting of drops on substrates patterned with polygonal posts
Source: Royal Society of Chemistry journal article supplement (doi:10.1039/c2sm26393a), 2012-11-02
Supplement: c2sm26393a.pdf [file c2sm26393a.pdf]

## Supporting material: simulation details

We model the system as a diffuse-interface, two-phase fluid in contact with a solid substrate. The thermodynamic state of the fluid is described by an order parameter  $\rho(\mathbf{r})$ , corresponding to the density of the fluid at each point  $\mathbf{r}$ . The equilibrium properties are modelled by a Landau free energy functional over the spatial domain of the fluid  $\mathcal{D}$ , and its boundary with solid surfaces  $\partial\mathcal{D}$ , as <sup>1</sup>

$$\Psi = \iiint_{\mathcal{D}} (p_c \{v^4 - 2\beta\tau_w(1-v^2) - 1\} - \mu_b\rho + \frac{1}{2}\kappa|\nabla\rho|^2) dV - \iint_{\partial\mathcal{D}} \mu_s\rho dS. \quad (1)$$

The first term in the integrand of (4) is the bulk free energy density, where  $v = (\rho - \rho_c) / \rho_c$  and  $\rho_c$ ,  $p_c$ , and  $\beta\tau_w$  are constants. It allows two equilibrium bulk phases, liquid and gas, with  $v = \pm\sqrt{\beta\tau_w}$ . The second term is a Lagrange multiplier constraining the total mass of the fluid. The third term is a free energy cost associated with density gradients. This allows for a finite width, or diffuse, interface to arise between the bulk phases, with surface tension  $\gamma = \frac{4}{3}\rho_c\sqrt{2\kappa p_c(\beta\tau_w)^3}$  and width  $\chi = \frac{1}{2}\rho_c\sqrt{\kappa(\beta\tau_w p_c)^{-1}}$ . The boundary integral takes the form proposed by Cahn.<sup>2</sup> Minimizing the free energy leads to a Neumann condition on the density

$$\partial_{\perp}\rho = -\frac{\mu_s}{\kappa}. \quad (2)$$

The wetting potential  $\mu_s$  is related to the Young angle  $\delta$  of the substrate by <sup>1</sup>

$$\mu_s = 2\beta\tau_w\sqrt{2p_c\kappa} \operatorname{sign}\left(\frac{\pi}{2} - \delta\right) \sqrt{\cos\frac{\alpha}{3}(1 - \cos\frac{\alpha}{3})} \quad \text{with } \alpha = \arccos(\sin^2\delta). \quad (3)$$

The hydrodynamics of the fluid is described by the continuity and the Navier-Stokes equations

$$\partial_t\rho + \partial_{\alpha}(\rho u_{\alpha}) = 0 \quad (4)$$

$$\partial_t(\rho u_{\alpha}) + \partial_{\beta}(\rho u_{\alpha}u_{\beta}) = -\partial_{\beta}P_{\alpha\beta} + \partial_{\beta}(\rho\eta(\partial_{\beta}u_{\alpha} + \partial_{\alpha}u_{\beta}) + \rho\lambda\delta_{\alpha\beta}\partial_{\gamma}u_{\gamma}), \quad (5)$$

where  $u$  is the local velocity,  $P$  is the pressure tensor derived from the free energy functional (1) as

$$P_{\alpha\beta} = \left( p_c(v+1)^2(3v^2 - 2v + 1 - \beta\tau_w) - \frac{1}{2}\kappa\partial_{\gamma}\rho\partial_{\gamma}\rho - \kappa\rho\partial_{\gamma}\rho \right) \delta_{\alpha\beta} + \kappa\partial_{\alpha}\rho\partial_{\beta}\rho, \quad (6)$$

with  $\eta = \frac{4\kappa}{3}(\tau - \frac{1}{2})$  and  $\lambda = \eta(1 - 12p_c\rho_c^{-2}\rho(3v^2 - \beta\tau_w))$  are the shear and bulk kinematic viscosities respectively. A free energy lattice Boltzmann algorithm is used to numerically solve equations 7 and 8.<sup>3-5</sup> At the substrate we impose the boundary condition (5),<sup>1,6</sup> and a condition of no-slip.<sup>7-9</sup> We choose  $\kappa = 0.01$ ,  $p_c = 0.125$ ,  $\rho_c = 3.5$ ,  $\tau_w = 0.3$  and  $\beta = 1.0$ , giving an interfacial thickness  $\chi = 0.9$ , surface tension  $\gamma = 0.029$  and a density ratio of 3.42. The viscosity ratio is  $\eta_L / \eta_G = 7.5$ .

We concentrate our attention on substrates patterned with hexagonal arrays of posts with equilateral triangles as cross-sections. The posts have height  $h = 20$  l.u. (lattice units or cells), side length  $b = 20$  l.u., and centre-to-centre separation  $d = 40$  l.u.. The posts and the base substrate have the same Young angle  $\delta$ .

## References

1. A. J. Briant, A. J. Wagner, and J. M. Yeomans, *Phys. Rev. E*, 2004, **69**, 031602.
2. J. W. Cahn, *The Journal of Chemical Physics*, 1977, **66**, 3667.
3. M. R. Swift, E. Orlandini, W. R. Osborn, and J. M. Yeomans, *Phys. Rev. E*, 1996, **54**, 5041.
4. S. Succi, *The Lattice Boltzmann Equation for Fluid Dynamics and Beyond*, Oxford University Press, USA, 2001.

5. J. M. Yeomans, *Physica A: Statistical Mechanics and its Applications*, 2006, **369**, 159.
6. A. Dupuis and J. M. Yeomans, *Langmuir*, 2005, **21**, 2624.
7. C. M. Pooley, H. Kusumaatmaja, and J. M. Yeomans, *Phys. Rev. E*, 2008, **78**, 056709.
8. A. J. C. Ladd, *Journal of Fluid Mechanics*, 1994, **271**, 311.
9. M. Bouzidi, M. Firdaouss, and P. Lallemand, *Physics of Fluids*, 2001, **13**, 3452.
